# Supplementary material for: BHLHE40 Maintains the Stemness of PαS Cells In Vitro by Targeting Zbp1 through the Wnt/β-Catenin Signaling Pathway
Source: MDPI journal article supplement (doi:10.3390/biomedicines11082190), 2023-08-03
Supplement: s1 [file s1]

# Supplementary Materials

**Table S1.** The specific information of animals, materials, and reagents used in this study.

| Animals/Reagents/Materials                  | Company                            | City         | Country |
|---------------------------------------------|------------------------------------|--------------|---------|
| C57BL/6N                                    | Charles River                      | Beijing      | China   |
| BALB/c nude mice                            | Charles River                      | Beijing      | China   |
| Cell culture materials                      | Corning                            | Corning      | USA     |
| $\beta$ -TCP                                | Bicon                              | Boston       | USA     |
| collagen membrane                           | Bonag                              | Beijing      | China   |
| $\alpha$ -MEM                               | Gibco                              | Grand island | USA     |
| FBS                                         | Gibco                              | Grand island | USA     |
| penicillin G                                | Gibco                              | Grand island | USA     |
| streptomycin                                | Gibco                              | Grand island | USA     |
| EDTA                                        | Gibco                              | Grand island | USA     |
| dexamethasone                               | Sigma                              | St. Louis    | USA     |
| L-ascorbic acid                             | Sigma                              | St. Louis    | USA     |
| $\beta$ -glycerophosphoric acid             | Sigma                              | St. Louis    | USA     |
| L-lactic acid diphosphate                   | Sigma                              | St. Louis    | USA     |
| sodium pyruvate                             | Boaotoda Technology                | Beijing      | China   |
| L-proline                                   | Boaotoda Technology                | Beijing      | China   |
| TGF- $\beta$ 1                              | Nearshore Protein Technology       | Suzhou       | China   |
| ITS                                         | Biyuntian                          | Shanghai     | China   |
| Bhlhe40-overexpressing lentivirus (Bhlhe40) | GenePharma                         | Suzhou       | China   |
| negative control lentivirus (Vector)        | GenePharma                         | Suzhou       | China   |
| polystyrene                                 | Sigma                              | St. Louis    | USA     |
| puromycin                                   | Sigma                              | St. Louis    | USA     |
| siZbp1                                      | GenePharma                         | Suzhou       | China   |
| siNC                                        | GenePharma                         | Suzhou       | China   |
| Lipofectamine 3000                          | Invitrogen                         | Carlsbad     | USA     |
| IWR-1 endo                                  | Maclean Biochemical Technology     | Shanghai     | China   |
| CCK8                                        | Dojindo                            | Kumamoto     | Japan   |
| PBS                                         | Sigma                              | St. Louis    | USA     |
| paraformaldehyde                            | Sigma                              | St. Louis    | USA     |
| crystal violet                              | Puli Gene Technology               | Beijing      | China   |
| ALP Staining Kit                            | Biyuntian                          | Shanghai     | China   |
| BCA protein detection kit                   | Thermo Scientific                  | Waltham      | USA     |
| ALP detection kit                           | Jiancheng Bioengineering Institute | Nanjing      | China   |
| ARS solution                                | Sigma                              | St. Louis    | USA     |
| cetylpyridine chlorination                  | Sigma                              | St. Louis    | USA     |
| Alcian blue solution                        | Solarbio                           | Beijing      | China   |
| TRIzol                                      | Invitrogen                         | Carlsbad     | USA     |
| Prime Script RT Reagent Kit                 | Takara                             | Tokyo        | Japan   |
| Power SYBR Green PCR Master Mix             | Roche Applied Science              | Mannheim     | Germany |
| CD45 antibody                               | BioLegend                          | San Diego    | USA     |
| PDGFR $\alpha$ antibody                     | BioLegend                          | San Diego    | USA     |
| TER119 antibody                             | BioLegend                          | San Diego    | USA     |

|                         |                           |           |       |
|-------------------------|---------------------------|-----------|-------|
| SCA-1 antibody          | BioLegend                 | San Diego | USA   |
| BGP ELISA kit           | Illarite Biotechnology    | Wuhan     | China |
| PPAR $\gamma$ ELISA kit | Illarite Biotechnology    | Wuhan     | China |
| COMP ELISA kit          | Cloud Clone Technology    | Wuhan     | China |
| NANOG ELISA kit         | Cloud Clone Technology    | Wuhan     | China |
| OCT4 ELISA kit          | Cloud Clone Technology    | Wuhan     | China |
| BHLHE40 IP antibody     | Proteintech Group         | San Diego | USA   |
| ChIP kit                | Cell Signaling Technology | Boston    | USA   |

---
